# Supplementary material for: Highly Sensitive and Selective Toluene Gas Sensors Based on ZnO Nanoflowers Decorated with Bimetallic AuPt
Source: MDPI journal article supplement (doi:10.3390/molecules29071657), 2024-04-07
Supplement: s1 [file s1]

# Supporting Information

## Highly Sensitive and Selective Toluene Gas Sensors Based on ZnO Nanoflowers Decorated with Bimetallic AuPt

Huiting Peng <sup>1</sup>, Yiping Liu <sup>1</sup>, Yinfeng Shen <sup>1</sup>, Ling Xu <sup>2</sup>, Jicun Lu <sup>2</sup>, Ming Li <sup>1</sup>,

Hong-Liang Lu <sup>3,\*</sup> and Liming Gao <sup>1,\*</sup>

*1 State Key Laboratory of Metal Matrix Composites, School of Material Science and Engineering, Shanghai Jiao Tong University, Shanghai 200240, China*

*2 Guanghai Lingang Engineering Application Technology Research and Development (Shanghai) Co, Ltd., Shanghai 201306, China*

*3 State Key Laboratory of ASIC and System, Shanghai Institute of Intelligent Electronics & Systems, School of Microelectronics, Fudan University, Shanghai 200433, China*

*\* Correspondence: honglianglu@fudan.edu.cn (H.-L.L.); liming.gao@sjtu.edu.cn (L.G.)*

**Table S1.** The comparison of responses at different concentration of toluene between the newly prepared and previous sensor at 175 °C.

|                       |  | Concentration |      |      |      |       |
|-----------------------|--|---------------|------|------|------|-------|
| Response              |  | (ppm)         | 25   | 50   | 75   | 100   |
| Sensors               |  |               |      |      |      |       |
| Previous sensor       |  |               | 33.2 | 69.7 | 91.1 | 107.6 |
| Newly prepared sensor |  |               | 41.3 | 66.8 | 88.1 | 107.0 |

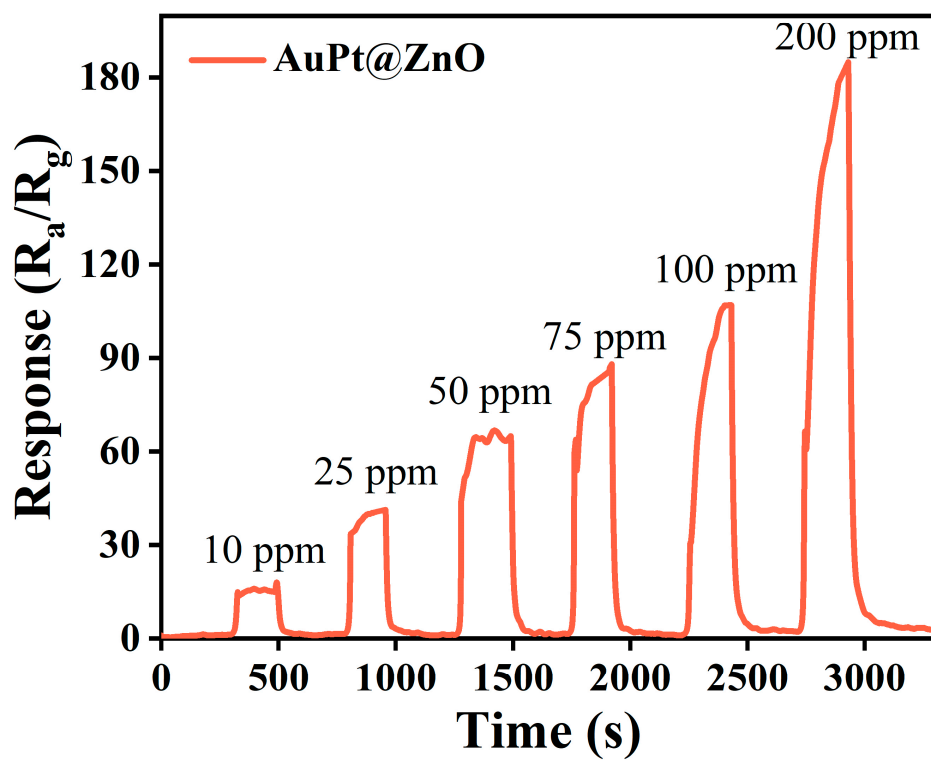

**Figure S1.** Response curve of reproduced AuPt@ZnO-based sensor at 175 °C towards toluene at the concentration ranging from 10 to 200 ppm.

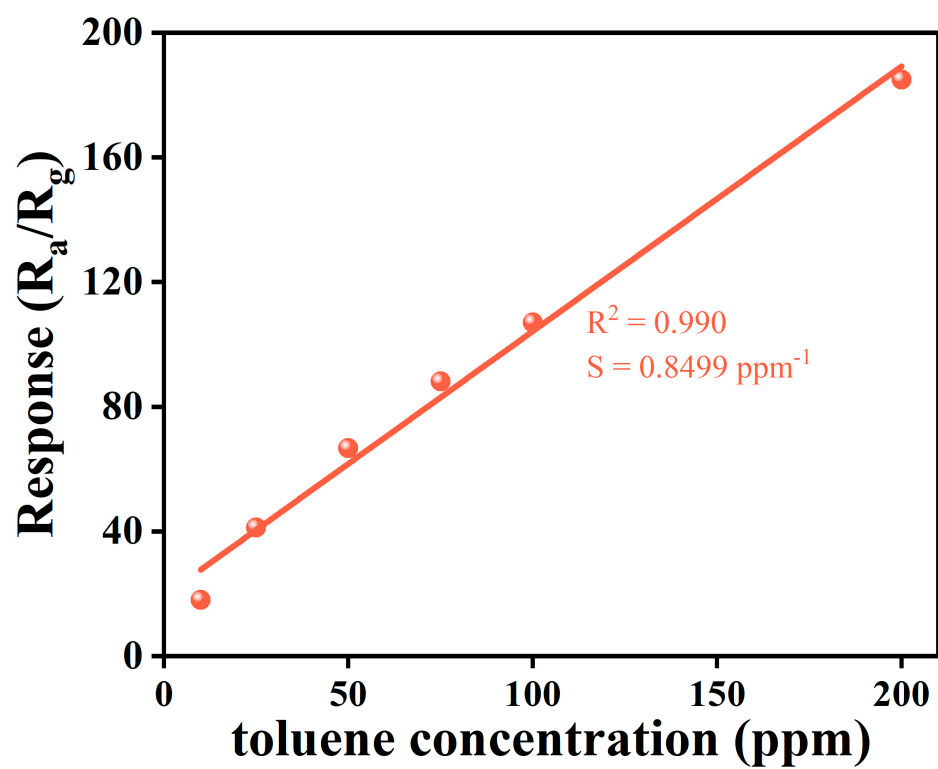

**Figure S2.** Fit curves of the response of the reproduced AuPt@ZnO-based sensor versus toluene concentration at 175 °C.

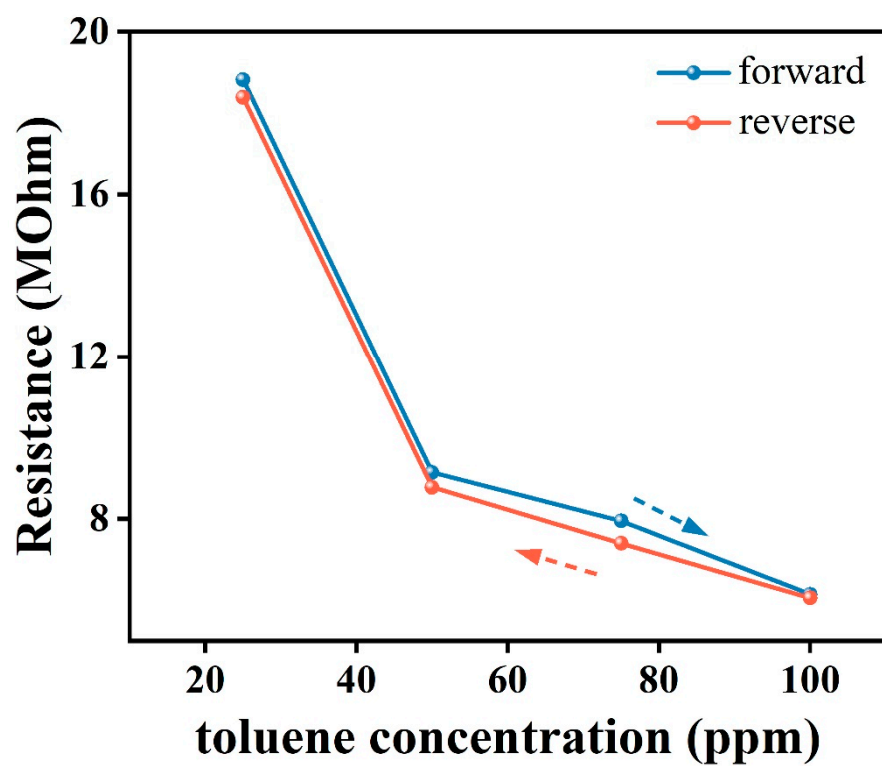

**Figure S3.** Hysteresis characteristics of the AuPt@ZnO-based sensor.
